# Supplementary material
Source: PubMed Central journal article supplement (PMC3186971)
Supplement: supp_55_10_4631__1.pdf [file supp_55_10_4631__1.pdf]

|                   |                                             |                  |                                               |               |                             |
|-------------------|---------------------------------------------|------------------|-----------------------------------------------|---------------|-----------------------------|
| <b>TERM-L-REP</b> | 3'-*CGCGTGGCCCCTAGGATCCGC-5'                | <b>3' TERM-L</b> | 3'-ACGGATCCTAGGTGACACGC-5'                    | <b>AUG-GP</b> | 3'-CGTGTACCCTCGTCAAGTAAT-5' |
| <b>TERM-L</b>     | 3'-GCGTGGCCCCTAGGATCCGC-5'                  |                  |                                               |               |                             |
|                   | 5' 3'                                       |                  | 5' 3'                                         |               | 5' 3'                       |
| JUNV S            | { vRNA .....<br>vCRNA .....a.u.....a        | JUNV S           | { vRNA .....<br>vCRNA c.....g.....            | JUNV          | .....                       |
| JUNV L            | { vRNA .....<br>vCRNA .....                 | JUNV L           | { vRNA .....<br>vCRNA c.....c.....            | TCRV          | c...c.....a.....            |
| TCRV S            | { vRNA not reported<br>vCRNA .....a.u.....a | TCRV S           | { vRNA .....<br>vCRNA not reported            | PICV          | ca.ag.....aa.ug.g.          |
| TCRV L            | { vRNA .....<br>vCRNA .....a.u.....         | TCRV L           | { vRNA c.....<br>vCRNA c.....c.g.....         | LCMV          | .a.gg.....a.ug.g.           |
| PICV S            | { vRNA .....a.u.....<br>vCRNA .....a.....a  | PICV S           | { vRNA c.....<br>vCRNA .....c.g.....          |               |                             |
| PICV L            | { vRNA .....a.....a<br>vCRNA .....a.....a   | PICV L           | { vRNA .....u.g.....<br>vCRNA .....u.g.....   | <b>AUG-NP</b> | 3'-TTAGTGGTCTTGAAGACCGTA-5' |
| LCMV S            | { vRNA .....u<br>vCRNA .....a.u.....a       | LCMV S           | { vRNA .....<br>vCRNA a.....c.g.....          | JUNV          | 5' ..... 3'                 |
| LCMV L            | { vRNA .....a<br>vCRNA .....a.....u         | LCMV L           | { vRNA a.....<br>vCRNA a.....u.g.....         | TCRV          | cc.ug.uuug.ucg.caua.....    |
|                   |                                             |                  |                                               | PICV          | .gugug.ac.ac..caaa.....     |
| <b>TERM-S</b>     | 3'-*CGCGTGTACCTAGGATCCG-5'                  | <b>3' TERM-S</b> | 3'-GCGGATCCTAGGGGCCACGC-5'                    | LCMV          | g.aac.auug.gcaacaag.....    |
|                   | 5' 3'                                       |                  | 5' 3'                                         |               |                             |
| JUNV S            | { vRNA .....c.g.....<br>vCRNA .....c.g..... | JUNV S           | { vRNA u.....a.u.....<br>vCRNA .....a.u.....  | <b>AUG-Z</b>  | 3'-CTTCTCCGTCTGTTTACCCGT-5' |
| JUNV L            | { vRNA .....c.g.....<br>vCRNA .....c.g..... | JUNV L           | { vRNA .....a.u.....<br>vCRNA .....a.u.....   | JUNV          | 5' ..... 3'                 |
| TCRV S            | { vRNA not reported<br>vCRNA .....c.g.....  | TCRV S           | { vRNA u.....a.u.....<br>vCRNA not reported   | TCRV          | a..acuuuuc.agc.....         |
| TCRV L            | { vRNA .....c.g.....<br>vCRNA .....c.g..... | TCRV L           | { vRNA .....a.u.....<br>vCRNA .....a.u.....   | PICV          | .guc.aaacuuggg.....ac       |
| PICV S            | { vRNA .....c.g.....<br>vCRNA .....c.g..... | PICV S           | { vRNA .....a.u.....<br>vCRNA u.....u.....    | LCMV          | uugagccucc.gcc.....c        |
| PICV L            | { vRNA .....c.g.....<br>vCRNA .....c.a..... | PICV L           | { vRNA u.....<br>vCRNA u.....u.....           |               |                             |
| LCMV S            | { vRNA .....c.g.....<br>vCRNA .....c.g..... | LCMV S           | { vRNA u.....a.u.....<br>vCRNA a.....a.u..... | <b>AUG-L</b>  | 3'-CGTGAACTCGTACCTCCTTAG-5' |
| LCMV L            | { vRNA .....c.g.....<br>vCRNA .....c.a..... | LCMV L           | { vRNA a.....a.u.....<br>vCRNA a.....u.....   | JUNV          | 5' ..... 3'                 |
|                   |                                             |                  |                                               | TCRV          | .....c.....t..a.            |
|                   |                                             |                  |                                               | PICV          | ttt.....t.....a             |
|                   |                                             |                  |                                               | LCMV          | ttga.gcgca.....t..ga.       |
|                   |                                             |                  |                                               | <b>IGS-S</b>  | 3'-GACCGGCGCCTGACCCCTCC-5'  |
|                   |                                             |                  |                                               | JUNV          | 5' ..... 3'                 |
|                   |                                             |                  |                                               | <b>RANDOM</b> | 3'-ACTCCATCGTTCAGCTCTGA-5'  |

**Supplementary Figure S1.** Arenavirus genomic sequences and complementary PPMO sequences are shown. Complementarity between PPMO and each target is indicated with a dot; mismatched nucleotides are indicated with letters. Asterisks denote the 3'-terminal base that was intended to pair with the 5'-terminal guanine that marks intracellular viral RNA template strands. AUG translation initiation codons in each viral mRNA are marked with a red box. Red arrows indicate the direction of translation.
